# Supplementary material for: DeeReCT-TSS: A novel meta-learning-based method annotates TSS in multiple cell types based on DNA sequences and RNA-seq data
Source: Research Square preprint supplement (doi:10.21203/rs.3.rs-640669/v1), 2021-06-21
Supplement: Supplementary file 1 [file 8916521e89cf4063303c59f1.docx]

**Supplementary Table S1: The number of TSSs and the corresponding genes from each cell line used in this study.**

| **Metrics** | **#Active TSS** | **#Active Genes** | **#Total TSS** | **#Total Genes** |
| --- | --- | --- | --- | --- |
| NK T-cell leukemia cell line | 24430 | 10265 | 47642 | 14392 |
| Colon carcinoma cell line | 19986 | 10482 | 38209 | 14513 |
| Gastrointestinal carcinoma cell line | 26105 | 11198 | 53113 | 16006 |
| Acute lymphoblastic leukemia cell line | 29348 | 10631 | 51909 | 14741 |
| Lung carcinoma cell line | 28325 | 11482 | 52944 | 16365 |
| Myeloma cell line | 21379 | 10127 | 41985 | 14378 |
| Neuroblastoma cell line | 26458 | 11443 | 50151 | 15963 |
| Renal carcinoma cell line | 22493 | 11046 | 45023 | 15653 |
| Adult T-cell leukemia cell line | 24924 | 10592 | 49537 | 15409 |
| Testicular germ cell line | 30921 | 11944 | 59602 | 17324 |

**Supplementary Table S2: Performance of deep-learning-based model on TSS binary classification using both DNA and RNA-seq information (Integrated Model), DNA sequence alone (Sequence Only), and RNA-seq coverage (Coverage Only) alone, respectively.**

|  | **Metrics** | **Integrated Model** | **Sequence Only** | **Coverage Only** |
| --- | --- | --- | --- | --- |
| Colon carcinoma cell line | Accuracy | **0.93859** | 0.91493 | 0.77006 |
| TPR (Recall) | **0.90855** | 0.89044 | 0.78362 |
| FDR | **0.03337** | 0.06372 | 0.23706 |
| F1 Score | **0.93669** | 0.91280 | 0.77314 |
| Adult T-cell leukemia cell line | Accuracy | **0.90055** | 0.87281 | 0.79748 |
| TPR (Recall) | **0.85616** | 0.82927 | 0.76909 |
| FDR | **0.06042** | 0.09163 | 0.18461 |
| F1 Score | **0.89593** | 0.86702 | 0.79156 |
| Renal carcinoma cell line | Accuracy | **0.91836** | 0.88436 | 0.79715 |
| TPR (Recall) | **0.85180** | 0.82559 | 0.76682 |
| FDR | **0.01739** | 0.06444 | 0.18365 |
| F1 Score | **0.91253** | 0.87713 | 0.79081 |

**Supplementary Table 2: An example of predicted TSS clustering output**

| **Chr** | **Start** | **End** | **Score** | **Gene** | | **Str** | **P value** |
| --- | --- | --- | --- | --- | --- | --- | --- |
| chr15 | 37392655 | 37392656 | 2956 | ENSG00000134138.:MEIS2 | - | | 5.2e-119 |
| chr13 | 72440475 | 72440476 | 2358 | ENSG00000276644:DACH1 | - | | 4.4e-95 |
| chr16 | 1359666 | 1359667 | 2170 | ENSG00000103275.:UNE2I | + | | 1.4e-87 |
| chr15 | 85524759 | 85524760 | 2094 | ENSG00000138081.:PDE8A | + | | 1.6e-84 |
| chr2 | 48133131 | 48133132 | 1881 | ENSG00000072062:FBXO11 | - | | 5.2e-76 |
